# Supplementary material for: Evolution of non-kin cooperation: social assortment by cooperative phenotype in guppies
Source: PubMed Central journal article supplement (PMC6366236; doi:10.1098/rsos.181493), 2018-12-26
Supplement: rsos181493supp1.pdf [file rsos181493supp1.pdf]

**APPENDIX A**

**Schematic drawing of test tank**

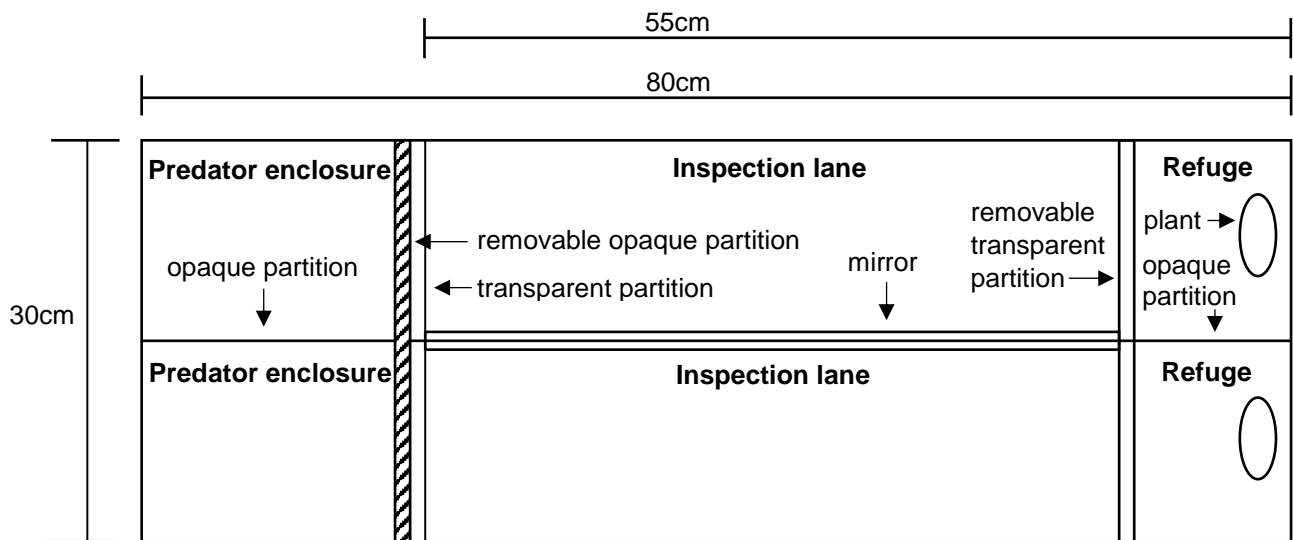

Schematic drawing of a predator inspection test tank. The tank is divided lengthwise into two identical, fully separated test arenas.
