# Supplementary material for: Evolution of non-kin cooperation: social assortment by cooperative phenotype in guppies
Source: PubMed Central journal article supplement (PMC6366236; doi:10.1098/rsos.181493), 2018-12-26
Supplement: rsos181493supp3.pdf [file rsos181493supp3.pdf]

**APPENDIX C****Details of genetic analysis**

Genotyping of two populations of Trinidadian guppies. HP = high predation population, LP = low predation population. See below for a list of the given references.

| Locus  | Multiple x | HP         |                              |                              |                                                   | LP         |                              |                              |                                                   | References             |
|--------|------------|------------|------------------------------|------------------------------|---------------------------------------------------|------------|------------------------------|------------------------------|---------------------------------------------------|------------------------|
|        |            | Size range | Observed heterozygosity (HO) | Expected heterozygosity (HE) | Test for Hardy-Weinberg Equilibrium (HWE) p-value | Size range | Observed heterozygosity (HO) | Expected heterozygosity (HE) | Test for Hardy-Weinberg Equilibrium (HWE) p-value |                        |
| G43    | 1          | 232-290    | 0.826                        | 0.971                        | 0.0446                                            | 282-392    | 0.625                        | 0.860                        | <0.0001                                           | Shen et al. (2007)     |
| G289   | 1          | 280-316    | 0.767                        | 0.825                        | 0.4568                                            | 258-304    | 0.623                        | 0.618                        | 0.6388                                            | Shen et al. (2007)     |
| Pr171  | 1          | 163-369    | 0.395                        | 0.693                        | <0.0001                                           | 253-365    | 0.703                        | 0.811                        | <0.0001                                           | Becher et al. (2002)   |
| Pr39   | 1          | 148-190    | 0.701                        | 0.790                        | 0.0625                                            | 160-182    | 0.419                        | 0.422                        | 0.8021                                            | Becher et al. (2002)   |
| Pr80   | 1          | 133-215    | 0.678                        | 0.777                        | 0.0161                                            | 141-235    | 0.473                        | 0.495                        | 0.5386                                            | Becher et al. (2002)   |
| Pr92   | 1          | 157-175    | 0.628                        | 0.564                        | 0.3766                                            | 155-169    | 0.235                        | 0.228                        | 0.1146                                            | Becher et al. (2002)   |
| G183   | 2          | 231-293    | 0.679                        | 0.704                        | 0.1003                                            | 235-265    | 0.376                        | 0.363                        | 0.9762                                            | Shen et al. (2007)     |
| Pre8   | 2          | 182-346    | 0.718                        | 0.894                        | <0.0001                                           | 180-336    | 0.714                        | 0.720                        | 0.4242                                            | Paterson et al. (2005) |
| Pre15  | 2          | 183-335    | 0.918                        | 0.947                        | 0.4195                                            | 192-181    | 0.838                        | 0.868                        | 0.7069                                            | Paterson et al. (2005) |
| Pre26  | 2          | 102-228    | 0.810                        | 0.932                        | 0.0113                                            | 110-216    | 0.765                        | 0.758                        | 0.3992                                            | Paterson et al. (2005) |
| Pret69 | 2          | 110-174    | 0.506                        | 0.583                        | 0.614                                             | 110-178    | 0.507                        | 0.461                        | 0.8565                                            | Watanabe et al. (2003) |
| AGAT11 | 3          | 212-345    | 0.906                        | 0.952                        | 0.0526                                            | 149-335    | 0.932                        | 0.928                        | 0.1958                                            | Olendorf et al. (2004) |
| PP_5   | 3          | 161-305    | 0.953                        | 0.955                        | 0.1533                                            | 167-265    | 0.851                        | 0.875                        | 0.0453                                            | Nater et al. (2008)    |
| PP_H2  | 3          | 226-452    | 0.783                        | 0.948                        | <0.0001                                           | 360-462    | 0.791                        | 0.943                        | 0.0065                                            | Nater et al. (2008)    |
| Pre17  | 3          | 139-205    | 0.423                        | 0.846                        | <0.0001                                           | 93-243     | 0.427                        | 0.597                        | <0.0001                                           | Paterson et al. (2005) |
| Pre9   | 3          | 135-255    | 0.826                        | 0.902                        | 0.0044                                            | 163-235    | 0.628                        | 0.657                        | 0.2574                                            | Paterson et al. (2005) |

**References**

Becher SA, Russell ST, Magurran AE. 2002 Isolation and characterization of polymorphic microsatellites in the Trinidadian guppy (*Poecilia reticulata*). *Mol. Ecol. Notes* **2**, 456–458.

Nater A, Krützen M, Lindholm AK. 2008 Development of polymorphic microsatellite markers for the livebearing fish *Poecilia parae*. *Mol. Ecol. Resour.* **8**, 857–860.

Olendorf R, Reudi B, Hughes KA. 2004 Primers for 12 polymorphic microsatellite DNA loci from the guppy (*Poecilia reticulata*). *Mol. Ecol. Notes* **4**, 668–671.

Paterson IG, Crispo E, Kinnison MT, Hendry AP, Bentzen P. 2005 Characterization of tetranucleotide microsatellite markers in the guppy (*Poecilia reticulata*). *Mol. Ecol. Notes* **5**, 269–271.

Shen X, Yang G, Liao M. 2007 Development of 51 genomic microsatellite DNA markers of guppy (*Poecilia reticulata*) and their application in closely related species. *Mol. Ecol. Notes* **7**, 302–306.

Watanabe T, Yoshida M, Nakajima M, Taniguchi N. 2003 Isolation and characterization of 43 microsatellite DNA markers for guppy (*Poecilia reticulata*). *Mol. Ecol. Notes* **3**, 487–490.
