# Supplementary material for: Evolution of non-kin cooperation: social assortment by cooperative phenotype in guppies
Source: PubMed Central journal article supplement (PMC6366236; doi:10.1098/rsos.181493), 2018-12-26
Supplement: rsos181493supp4.pdf [file rsos181493supp4.pdf]

**APPENDIX D****Results of tests for social assortment by cooperativeness in tabular form**

**Weighted assortment.** Results of tests for assortment by cooperativeness based on edge weights ( $r^w$ ), for two wild guppy populations living under high (HP) and low (LP) predation pressure. Significant p-values are in bold.

| Population | Individuals included | n   | $r^w$ from real network | Median $r^w$ from permuted networks | p             |
|------------|----------------------|-----|-------------------------|-------------------------------------|---------------|
| HP         | all                  | 61  | 0.09                    | -0.03                               | <b>0.0004</b> |
|            | females              | 40  | 0.12                    | -0.03                               | <b>0.0010</b> |
|            | males                | 21  | 0.02                    | -0.10                               | 0.0888        |
| LP         | all                  | 102 | 0.00                    | 0.00                                | 0.7800        |
|            | females              | 55  | -0.08                   | -0.03                               | 0.3310        |
|            | males                | 47  | -0.07                   | -0.03                               | 0.5916        |

**Unweighted assortment.** Results of tests for assortment by cooperativeness based on the presence and absence of edges ( $r^u$ ), for two wild guppy populations living under high (HP) and low (LP) predation pressure. Significant p-values are in bold.

| Population | Individuals included | n   | $r^u$ from real network | Median $r^u$ from permuted networks | p             |
|------------|----------------------|-----|-------------------------|-------------------------------------|---------------|
| HP         | all                  | 61  | 0.08                    | -0.02                               | <b>0.0004</b> |
|            | females              | 40  | 0.09                    | -0.03                               | <b>0.0024</b> |
|            | males                | 21  | 0.05                    | -0.08                               | <b>0.0412</b> |
| LP         | all                  | 102 | 0.02                    | -0.01                               | 0.3500        |
|            | females              | 55  | -0.06                   | -0.03                               | 0.5286        |
|            | males                | 47  | -0.06                   | -0.02                               | 0.5982        |
